# Supplementary material for: Low Prevalence of HSV-1 and Helicobacter pylori in HNSCC and Chronic Tonsillitis Patients Compared to Healthy Individuals
Source: MDPI journal article supplement (doi:10.3390/diagnostics13101798), 2023-05-19
Supplement: s1 [file s1]

**Table S1.** The prevalence of HSV-1 and *H. pylori* in the HNSCC group according to nodal status and histological grade

| Study group | Variable | Variant | HSV-1    |          | p     | <i>H. pylori</i> |          | p |
|-------------|----------|---------|----------|----------|-------|------------------|----------|---|
|             |          |         | negative | positive |       | negative         | positive |   |
| HNSCC       | N0       | Yes     | 41       | 2        | 0.438 | 43               | 0        | 1 |
|             |          | No      | 42       | 5        |       | 47               | 0        |   |
|             | N1       | Yes     | 19       | 3        | 0.355 | 22               | 0        | 1 |
|             |          | No      | 64       | 4        |       | 68               | 0        |   |
|             | N2       | Yes     | 20       | 2        | 1     | 22               | 0        | 1 |
|             |          | No      | 63       | 5        |       | 68               | 0        |   |
|             | N3       | Yes     | 3        | 0        | 1     | 3                | 0        | 1 |
|             |          | No      | 80       | 7        |       | 87               | 0        |   |
|             | N1+N2    | Yes     | 39       | 5        | 0.261 | 44               | 0        | 1 |
|             |          | No      | 44       | 2        |       | 46               | 0        |   |
|             | G1       | Yes     | 15       | 0        | 0.596 | 16               | 0        | 1 |
|             |          | No      | 68       | 7        |       | 74               | 0        |   |
|             | G2       | Yes     | 50       | 6        | 0.247 | 58               | 0        | 1 |
|             |          | No      | 33       | 1        |       | 32               | 0        |   |
|             | G3       | Yes     | 18       | 1        | 1     | 22               | 0        | 1 |
|             |          | No      | 65       | 6        |       | 68               | 0        |   |
|             | G1+G2    | Yes     | 65       | 6        | 1     | 71               | 0        | 1 |
|             |          | No      | 18       | 1        |       | 19               | 0        |   |

**Table S2.** The prevalence of HSV-1 or *H. pylori* and the sociodemographic characteristics (age, gender, drinking and smoking status) in patients with HNSCC, chronic tonsillitis and controls

| Study group         | Variable            | Variant | HSV-1    |          |       | <i>H. pylori</i> |          |       |
|---------------------|---------------------|---------|----------|----------|-------|------------------|----------|-------|
|                     |                     |         | negative | positive | p     | negative         | positive | p     |
| HNSCC               | Drinking            | Yes     | 55       | 6        | 0.422 | 61               | 0        | 1     |
|                     |                     | No      | 28       | 1        |       | 29               | 0        |       |
|                     | Smoking             | Yes     | 59       | 6        | 0.668 | 65               | 0        | 1     |
|                     |                     | No      | 24       | 1        |       | 25               | 0        |       |
|                     | Occasional drinking | Yes     | 44       | 6        | 0.127 | 50               | 0        | 1     |
|                     |                     | No      | 39       | 1        |       | 40               | 0        |       |
| Chronic tonsillitis | Drinking            | Yes     | 27       | 2        | 1     | 27               | 2        | 0.228 |
|                     |                     | No      | 58       | 6        |       | 63               | 1        |       |
|                     | Smoking             | Yes     | 11       | 3        | 0.097 | 14               | 0        | 1     |
|                     |                     | No      | 74       | 5        |       | 76               | 3        |       |
|                     | Occasional drinking | Yes     | 24       | 2        | 1     | 24               | 2        | 0.188 |
|                     |                     | No      | 62       | 5        |       | 66               | 1        |       |
| Control             | Drinking            | Yes     | 82       | 10       | 0.272 | 86               | 6        | 1     |
|                     |                     | No      | 16       | 4        |       | 19               | 1        |       |
|                     | Smoking             | Yes     | 26       | 5        | 0.527 | 29               | 2        | 1     |
|                     |                     | No      | 72       | 9        |       | 76               | 5        |       |
|                     | Occasional drinking | Yes     | 75       | 9        | 0.334 | 79               | 5        | 1     |
|                     |                     | No      | 23       | 5        |       | 26               | 2        |       |
|                     | Regular drinking    | Yes     | 7        | 1        | 1     | 7                | 1        | 0.414 |
|                     |                     | No      | 91       | 13       |       | 98               | 6        |       |
